# Supplementary material for: Inhibition of IGF-1 Signalling Enhances the Apoptotic Effect of AS602868, an IKK2 Inhibitor, in Multiple Myeloma Cell Lines
Source: PLoS One. 2011 Jul 25;6(7):e22641. doi: 10.1371/journal.pone.0022641 (PMC3143180; doi:10.1371/journal.pone.0022641)
Supplement: Table S1 — Forward and reverse primer sequences. (XLSX) [file pone.0022641.s004.xlsx]

## Sheet: Feuil1
		For	Rev	Supplier
	IGF1R	TGT GCA GAC AGG GGC TTT TA	ATC CAC GAT GCC TGT CTGA	EurogenTec
	IGF1R	AAA AAC CTT CGC CTC ATC CT	TGG TTG TCG AGG ACG TAG AA	EurogenTec
	IқB	CTA CAA TGG CCA CAC GTG TC	CAG GAG TGA CAC CAG GTC AG	EurogenTec
	IR	GCT GGA TTA TTG CCT CAA AGG	GAG AAT CTT CAG ACT CGA AT	EurogenTec
	IGF2R	TGG CCC TGT TGC TCT ACA	CAG CAA GTG GTC AGCTT ACTT ATC	EurogenTec
	IL-6	AG-AAA-AT-CCA-AAG-ATG-TAG-CC	CTC-TTG-TTA-CAT-GTC-TCC-TTT-CT
