# Supplementary material for: Inhibition of IGF-1 Signalling Enhances the Apoptotic Effect of AS602868, an IKK2 Inhibitor, in Multiple Myeloma Cell Lines
Source: PLoS One. 2011 Jul 25;6(7):e22641. doi: 10.1371/journal.pone.0022641 (PMC3143180; doi:10.1371/journal.pone.0022641)
Supplement: Table S2 — Antibodies reference. (XLSX) [file pone.0022641.s005.xlsx]

## Sheet: Feuil1
	Fluorescence	Reference	Supplier
CD45	Percyc-5	332784	Becton Dickinson
CD138	PC5	A54191	Beckman Coulter
CD38	APC	345807	Becton Dickinson
CD221	PE	555999	BD pharmingen
Isotype	FITC	555748	BD pharmingen
Isotype	PE	555749	BD pharmingen
Isotype	Percyc-5	555750	BD pharmingen
Isotype	APC	555751	BD pharmingen
