# Supplementary material for: Inhibition of IGF-1 Signalling Enhances the Apoptotic Effect of AS602868, an IKK2 Inhibitor, in Multiple Myeloma Cell Lines
Source: PLoS One. 2011 Jul 25;6(7):e22641. doi: 10.1371/journal.pone.0022641 (PMC3143180; doi:10.1371/journal.pone.0022641)
Supplement: Table S3 — Percentage of plasma cells CD221+ and CD221−. (XLSX) [file pone.0022641.s006.xlsx]

## Sheet: Feuil1
	% plasma cell CD221+	% plasma cell CD221-
Patient 1	30.9	68.2
Patient 2	38.2	61.8
Patient 3	81.2	17.3
Patient 4	18.3	80.4
Patient 5	22.5	77.5
Patient 6	15.3	83.9
Patient 7	25.5	73.6
Patient 8	28.5	70.3
